# Supplementary material
Source: PubMed Central journal article supplement (PMC3910755)
Supplement: AAC.01706-13_zac001142461so1.pdf [file AAC.01706-13_zac001142461so1.pdf]

**Table S1. Oligonucleotides used in this work**

| Oligonucleotide | Sequence (5'→3') <sup>a</sup>             | Nucleotide position <sup>b</sup>                |
|-----------------|-------------------------------------------|-------------------------------------------------|
| CatMED          | CCTAACTCTCCGTCGCTATTG                     | Complementary to 213 to 233 of <i>cat</i>       |
| CatI            | ATGAACTTTAATAAAAATTGATTTAGAC              | 1 to 26 of <i>cat</i>                           |
| CatDownSph      | gcgcg <b>catgc</b> GATATGGATCTGGAGCTGTAA  | Complementary to 734 to 754 of <i>cat</i>       |
| CATRTF          | ATACCGAAACATAAAAACAAGAAGG                 | 113 to 137 of <i>cat</i>                        |
| CATRTR          | TACAGGAGTCCAAATACCAGAGAA                  | Complementary to 288 to 312 of <i>cat</i>       |
| Spr1684RTF      | CCATCGGCTAGTCTGACCCAAAAG                  | 310 to 333 of <i>fatD</i>                       |
| Spr1684RTR      | ATCCCAATCAGAGGCAACATCCAC                  | Complementary to 414 to 437 of <i>fatD</i>      |
| Spr1685RTF      | CTACTTTTGGCCCATCACTCACTT                  | 72 to 95 of <i>fatC</i>                         |
| Spr1685RTR      | CCCAAATACTAGGCGTCAGGAA                    | Complementary to 205 to 227 of <i>fatC</i>      |
| Spr1793F1       | gcgcg <b>ctag</b> ACAGTGTTTTGAACCACCAGC   | -79 to -58 of <i>spr1793</i>                    |
| Spr1793R1       | GGGAGTCGGGAACTCGGCAAC                     | Complementary to 936 to 957 of <i>spr1793</i>   |
| SPR1793R2       | GTCGCACCCAATTCACGTGCA                     | Complementary to 1214 to 1235 of <i>spr1793</i> |
| Spr1793R3       | GTCTGCTAAATCATCCATCTC                     | Complementary to 101 to 122 of <i>spr1793</i>   |
| Spr1794F1       | CAGCTGACCTGAGGCAAATC                      | 121 to 142 of <i>spr1794</i>                    |
| Spr1794R1       | gcgcg <b>catg</b> CAATAGAAGTACAAAACCCTGT  | Complementary to 1160 to 1181 of <i>spr1794</i> |
| SpxBDOWNF1      | gcgcg <b>tcta</b> GAAGAAGAAGGATTGCAATCACG | 1741 to 1763 of <i>spxB</i>                     |
| SpxBDOWNR1      | GGCTACAGAGGCAGGAGAATTTG                   | Complementary to 126 to 148 of <i>spr0645</i>   |
| SpxBDOWNR2      | GTGTATCCATAGCACCGAGTCC                    | Complementary to -12 to 10 of <i>spr0646</i>    |
| SpxBUPF1        | GCTCAGACAAGTCGTGCGCCGAT                   | 1012 to 1034 of <i>spr0641</i>                  |
| SpxBUPF2        | CGAGTGCGTCCCGGTGAAAAG                     | 790 to 810 of <i>spr0641</i>                    |
| SpxBUPR1        | cgcg <b>catgc</b> TGCTGCAGATGCAGTAATTTTCC | Complementary to 11 to 33 of <i>spxB</i>        |
| UtrcatXba       | gcgcg <b>tcta</b> GACGGAGCTTATCAACGTAGT   | -449 to -429 of <i>cat</i>                      |
| UptrcaEco       | cgcg <b>gaatt</b> CTTTTCTTCATCATCGGTCATA  | Complementary to -326 to -305 of <i>cat</i>     |
| UpfatDF1        | cgcg <b>gaattc</b> GCTCATGTAAAGGAATGAA    | -422 to -402 of <i>fatD</i>                     |
| UpfatDR1        | TCTACATGAAAGGACGGGGT                      | Complementary to -20 to -1 of <i>fatD</i>       |
| 16SDNAF3        | GGTGAGTAACGCGTAGGTAA                      | 101 to 120 of 16SrDNA                           |
| 16SDNAR3        | ACGATCCGAAAACCTTCTTC                      | Complementary to 407 to 426 of 16SrDNA          |

<sup>a</sup> The 5' ends of some of the primers contained a restriction site, which is in boldface. Bases not present in *S. pneumoniae* R6 are lowercased.

<sup>b</sup> Nucleotide numbering refers to the genes of the *S. pneumoniae* R6 sequence, except for CATMED coming from the pJS3 plasmid, with the first nucleotide being at position 1.
